# Supplementary material for: Effects of Head Kinematics and COM on CHS of 5-Iron Among Male Golfers of Varied Skill Levels
Source: Research Square preprint supplement (doi:10.21203/rs.3.rs-8213762/v1), 2025-12-30
Supplement: Supplementary file 1 [file 76bbe397936add80787132f1.docx]

Responses to Journal Requirements

1 .Style RequirementsRe: We have carefully reviewed and adiusted the manuscript to comply with BMC Sports Science, Medicine and Rehabilitation style guidelines, including file naming conventions, using the templates provided at the specified URLsAll revised files are renamed according to journal guidelines.We have added a statement that does not constitute a double publication in the "Manuscript file" and re-uploaded the file (Lines 131-133).

Kind regards,

The Corresponding Author
